# Supplementary material
Source: MDPI journal article supplement (https://www.mdpi.com/2075-163X/11/8/829)
Supplement: s1 [file s1]

Viscosity data obtained during the experiment:

| Gothic model glass |          |                    | Renaissance model glass |          |                    | Baroque model glass |          |                    |
|--------------------|----------|--------------------|-------------------------|----------|--------------------|---------------------|----------|--------------------|
| t [°C]             | time [s] | log $\eta$ [dPa.s] | t [°C]                  | time [s] | log $\eta$ [dPa.s] | t [°C]              | time [s] | log $\eta$ [dPa.s] |
| 1381               | 1.33     | 2.181              | 1381                    | 0.8      | 1.913              | 1382                | 6.16     | 2.990              |
| 1334               | 2.1      | 2.385              | 1335                    | 1.29     | 2.129              | 1335                | 9.73     | 3.194              |
| 1288               | 3.48     | 2.615              | 1288                    | 2.1      | 2.349              | 1288                | 16.14    | 3.424              |
| 1240               | 6.98     | 2.945              | 1239                    | 3.62     | 2.598              | 1241                | 28.94    | 3.695              |
| 1193               | 10.36    | 3.116              | 1191                    | 6.58     | 2.875              | 1194                | 51.65    | 3.964              |
| 1145               | 20.52    | 3.439              | 1143                    | 12.75    | 3.187              | 1146                | 102.35   | 4.287              |
| 1098               | 42.56    | 3.787              | 1095                    | 27.14    | 3.548              | 1098                | 219.92   | 4.653              |
| 1050               | 90.84    | 4.150              | 1047                    | 63.1     | 3.955              | -                   | -        | -                  |
| 1001               | 238.14   | 4.619              | 1000                    | 173.56   | 4.452              | -                   | -        | -                  |
