# Supplementary material
Source: MDPI journal article supplement (https://www.mdpi.com/2075-163X/11/8/829)
Supplement: s1 [file s1]

XRF analyse of raw materials [wt. %]:

|                                    | quartz | pure sand | beech ash | K <sub>2</sub> CO <sub>3</sub> | limestone |
|------------------------------------|--------|-----------|-----------|--------------------------------|-----------|
| <b>SiO<sub>2</sub></b>             | 98.9   | 98.7      | 1.9       | 0.02                           | 2.8       |
| <b>Al<sub>2</sub>O<sub>3</sub></b> | 0.6    | 1.1       | 0.6       |                                | 1.5       |
| <b>CaO</b>                         | 0.1    | 0.04      | 35.0      | 0.01                           | 51.5      |
| <b>K<sub>2</sub>O</b>              | 0.2    | -         | 14.8      | 56.5                           | 0.3       |
| <b>Na<sub>2</sub>O</b>             | 0.1    | -         | 0.1       | 0.1                            | -         |
| <b>MgO</b>                         | 0.02   | -         | 6.3       | -                              | 1.5       |
| <b>MnO</b>                         | -      | -         | 2.7       | -                              | 0.03      |
| <b>Fe<sub>2</sub>O<sub>3</sub></b> | 0.1    | 0.03      | 0.4       | -                              | 0.3       |
| <b>P<sub>2</sub>O<sub>5</sub></b>  | 0.02   | -         | 2.6       | -                              | 0.02      |
| <b>TiO<sub>2</sub></b>             | 0.01   | 0.05      | 0.04      | -                              | 0.05      |
| <b>BaO</b>                         | -      | -         | 0.4       | -                              | -         |
| <b>SO<sub>3</sub></b>              | -      | -         | 1.5       | -                              | -         |
| <b>Cl</b>                          | -      | -         | 0.06      | -                              | <0.01     |
| <b>Rb<sub>2</sub>O</b>             | -      | -         | 0.04      | -                              | -         |
| <b>SrO</b>                         | -      | -         | 0.1       | -                              | 0.02      |
| <b>CO<sub>2</sub></b>              | -      | 0.06      | 33.5      | 43.3                           | 42.0      |
